# Supplementary material for: Development of a health behavior scale for older adults living alone receiving public assistance
Source: Springer Nature journal article supplement (doi:10.1186/s12889-021-11347-x), 2021-07-19
Supplement: MOESM1 [file 19373434]

**Additional file 1: English version of the final HBSO**

**Health behavior scale for older adults living alone receiving public assistance (HBSO)**

Evaluation

0: Disagree      1: Disagree to a certain extent      2: Agree to a certain extent      3: Agree

| No.                                      | Domain & Item                                                                                   | Evaluation   |   |   |   |
|------------------------------------------|-------------------------------------------------------------------------------------------------|--------------|---|---|---|
| <b>Self-perception of personal power</b> |                                                                                                 |              |   |   |   |
| 1                                        | I have places where I can relax besides home.                                                   | 0            | 1 | 2 | 3 |
| 2                                        | I have someone that I can talk to comfortably if I need to.                                     | 0            | 1 | 2 | 3 |
| 3                                        | I have my own ways to distract or change my mind.                                               | 0            | 1 | 2 | 3 |
| 4                                        | I spend my time trying to help others even in a small way.                                      | 0            | 1 | 2 | 3 |
| 5                                        | I have goals and hopes for the future of my life.                                               | 0            | 1 | 2 | 3 |
| <b>Practical skills for daily health</b> |                                                                                                 |              |   |   |   |
| 6                                        | I make sure to brush my teeth after every meal.                                                 | 0            | 1 | 2 | 3 |
| 7                                        | I choose foods by checking information such as nutritional value, salt and calories.            | 0            | 1 | 2 | 3 |
| 8                                        | I wash my hands and gargle regularly to protect against infection.                              | 0            | 1 | 2 | 3 |
| 9                                        | I gather information that helps me stay healthy from articles, TV programs and others.          | 0            | 1 | 2 | 3 |
| 10                                       | When I have dental problems, I do not leave them and go to see the dentist as soon as possible. | 0            | 1 | 2 | 3 |
| <b>No.1-10 total</b>                     |                                                                                                 | <b>point</b> |   |   |   |

Isozaki (Inoue) A, Tadaka E: Development of a health behavior scale for older adults living alone receiving public assistance, BMC Public Health.
