# Supplementary material for: Development of a health behavior scale for older adults living alone receiving public assistance
Source: Springer Nature journal article supplement (doi:10.1186/s12889-021-11347-x), 2021-07-19
Supplement: MOESM2 [file 19373434]

Additional file 2: Japanese version of the final HBSO

Health behavior scale for older adults living alone receiving public assistance (HBSO)

生活保護を受給している独居高齢者の保健行動尺度(HBSO)

以下の項目について、あなたのふだんの生活に、最も近い数字1つに○をつけてください。

| 領域/項目                              | あてはまらない | ややあてはまらない | ややあてはまる | あてはまる |
|------------------------------------|---------|-----------|---------|-------|
| <b>自分自身のパワーの認識</b>                 |         |           |         |       |
| 1 私には、家以外にもほっとできる身近な居場所がある         | 0       | 1         | 2       | 3     |
| 2 私には、ふだんから気軽に相談できる相手がいる           | 0       | 1         | 2       | 3     |
| 3 私には、気晴らしや気分転換ができる自分なりの方法がある      | 0       | 1         | 2       | 3     |
| 4 私は、小さなことでも人の役に立てるよう過ごしている        | 0       | 1         | 2       | 3     |
| 5 私には、この先の生活の目標や希望がある              | 0       | 1         | 2       | 3     |
| <b>日々の健康に向けた実践的スキル</b>             |         |           |         |       |
| 6 私は、食事の後には毎回、歯をみがくようにしている         | 0       | 1         | 2       | 3     |
| 7 私は、栄養成分、塩分、カロリーなどを確認して、食べ物を選んでいる | 0       | 1         | 2       | 3     |
| 8 私は、こまめに手洗いうがいをして、感染症を予防している      | 0       | 1         | 2       | 3     |
| 9 私は、記事やテレビ番組などで、健康に良い情報を集めている     | 0       | 1         | 2       | 3     |
| 10 私は、歯の調子が悪い時には、放っておかず、早めに受診している  | 0       | 1         | 2       | 3     |
| No.1-10 合計                         | 点       |           |         |       |

Isozaki (Inoue) A, Tadaka E: Development of a health behavior scale for older adults living alone receiving public assistance, BMC Public Health.
